# Supplementary material
Source: PubMed Central journal article supplement (PMC9679957)
Supplement: jamaneurol-e224208-s002.pdf [file jamaneurol-e224208-s002.pdf]

1 **Summary of amendments from the original protocol**

2

3 Original protocol

4 The original protocol was submitted to, and approved by the Research Ethical Board of the  
5 University Medical Center Groningen, the Netherlands. Approval was obtained 5 November  
6 2015, before the start of the trial.

7

8 The final protocol

9 The final protocol "*Study protocol for a randomized controlled multicentre study: the*  
10 *Foraminotomy ACDF Cost-Effectiveness Trial (FACET) in patients with cervical*  
11 *radiculopathy*" was submitted to *BMJ Open* 26 May 2016, accepted 14 October 2016 and  
12 published online 5 January 2017.

13

14 Summary of changes

15 The context of the original protocol was recorded in The Netherlands Trial Register  
16 (NTR5536, posted on the 26<sup>th</sup> of November 2015). Five important changes in the final  
17 protocol compared to the original protocol were:

- 18 - In the original protocol the primary objective is described as: "*Is the posterior cervical*  
19 *foraminotomy (FOR) technique effective in comparison to the anterior cervical*  
20 *discectomy with fusion (ACDF) with regards to reduction of cervical radicular pain*  
21 *measured by the ODOM criteria (4 point Likert Scale) and VAS arm pain*". In the  
22 additional statistical paragraph, the noninferiority design is described. In the published  
23 protocol, no objective but aims and hypotheses are given, with the primary hypothesis  
24 being "*the effectiveness of the FOR technique is noninferior compared with the ACDF*  
25 *technique*"
- 26 - In the published protocol an additional exclusion criterion is given, being: "*pure axial*  
27 *neck pain without radicular pain*".
- 28 - In the published protocol "*The surgeon has the choice to carefully coagulate and divide*  
29 *the venous plexus that covers the nerve sheath*" was added to the description of the  
30 FOR technique.
- 31 - In the published protocol the primary study parameters are referred to as "operative  
32 success" (post-operative decrease in radiculopathy assessed by the VAS for self-  
33 reported arm pain) and "patient success" (assessed by the modified Odom criteria).

34 - In the published protocol 7 participating centers are mentioned, while in the original  
 35 protocol 6 participating centers are described. This difference is because one center had  
 36 two locations, which were both added because of separate research ethical boards (the  
 37 Radboud University Center Nijmegen and Carnisius Wilhemina Hospital).

38 Further changes in the final (published) protocol are mainly textual, including more detailed  
 39 descriptions and more information on practical implementation of the trial. Two examples are  
 40 as followed:

| Original protocol                                                                                                                                                | Final (published) protocol                                                                                                                                                                                                                                                                                                                                           |
|------------------------------------------------------------------------------------------------------------------------------------------------------------------|----------------------------------------------------------------------------------------------------------------------------------------------------------------------------------------------------------------------------------------------------------------------------------------------------------------------------------------------------------------------|
| Exclusion criterion <i>“median located disc protrusion or osteophytic protrusion”</i>                                                                            | Exclusion criterion <i>“Median located disc protrusion or osteophytic protrusion (median located protrusion is defined as &gt;1/3 of the total discogenic component is located medially within the spinal canal”</i>                                                                                                                                                 |
| Description of the FOR technique: <i>“In cases of pure soft discs, the proximal root is visualized adequately for removal of the compressing disc material.”</i> | Description of the FOR technique: <i>“In cases of soft disc compressions, the proximal root is visualized adequately and mobilized to allow the removal of the compressing disc material. However, complete removal of the soft disc component is not strictly necessary and the decision to remove the soft component will be left to the surgeon’s preference”</i> |

41

42 After publication of the protocol, the protocol was amended 3 times:

- 43 1. 3 medical centers were added (this amendment was accepted on the 2<sup>nd</sup> of August  
 44 2017)
- 45 ○ Northwest Clinics (NWZ), Alkmaar
  - 46 ○ Haga Teaching Hospital, The Hague
  - 47 ○ Elisabeth-Tweesteden Ziekenhuis, Tilburg
- 48
- 49 2. An inclusion criterion was clarified, changing *malignant obesity to obesity WHO II or*  
 50 *higher (BMI>35)* (this amendment was accepted on the 28<sup>th</sup> of November 2017)

51 In our original protocol we defined *“malignant obesity (BMI>30)”* as an exclusion criterion for  
 52 the FACET study. This definition was unfortunately not correct, because it is a contradiction  
 53 in terms. It caused discussion among our participating medical centers and the people

54 monitoring our study. Therefore, we decided to clarify the definition in our protocol to “*obesity*  
55 *WHO class II or higher (BMI≥35)*”. Commonly, morbid obesity is classified as a BMI ≥40  
56 without comorbidities or BMI ≥ 35 with comorbidities. It is known that morbidly obese patients  
57 have more post-surgical complications, mainly because of the accompanied comorbidities. In  
58 case of cervical spine surgery, a posterior foraminotomy is not preferred in morbidly obese  
59 patients. This is because the posterior foraminotomy is performed in a prone position and  
60 patients with morbid obese would be difficult to place in this position, which would lead to  
61 more time needed in the operation room. Additionally, the prone position itself gives more  
62 risk during the surgery, because of more anesthesiologic challenges and a higher chance of  
63 pressure-related complications. Unfortunately, there is no literature regarding an optimal cut-  
64 off point in BMI for posterior versus anterior approached in cervical spine surgery. Therefore,  
65 we decided to exclude patients with obesity class II or higher, since they would not be  
66 equally suitable for both approached and should not be randomized in the light of our study.

67

68 3. To account for the premature ending of the inclusion due to COVID-19 related  
69 cancellation of non-emergent health care (this amendment was accepted on the 9<sup>th</sup> of  
70 December 2021)

71 During the trial, a lower inclusion rate was observed and several measures to improve  
72 inclusion were taken. This included frequent newsletters, defined instructions for surgeons to  
73 include participants and the enrollment of additional medical centers. Nonetheless, a delay in  
74 inclusion could not be fully alleviated. When also the COVID-pandemic started, with an  
75 extreme reduction of non-emergent health care, an interim analysis was performed by a  
76 statistician who was not involved in the study design. This interim analysis indicated that it  
77 was safe to end the inclusion at 86% of the predefined sample size with a low risk of false  
78 negatives.

79

80
