# Supplementary material
Source: PubMed Central journal article supplement (PMC9679957)
Supplement: jamaneurol-e224208-s003.pdf [file jamaneurol-e224208-s003.pdf]

# Final Statistical Analysis Plan

1  
2  
3  
4  
5  
6  
7  
8  
9  
10  
11  
12  
13  
14  
15  
16  
17  
18  
19  
20  
21  
22  
23  
24  
25  
26  
27  
28  
29  
30  
31  
32  
33

(according to the paper submitted to the JAMA Neurology and its supplementary material)

34

35 **Abbreviations:**

|                 |                                            |
|-----------------|--------------------------------------------|
| <b>ACDF</b>     | Anterior Cervical Discectomy with Fusion   |
| <b>EQ-5D-5L</b> | EuroQol 5-Dimensions 5-Level               |
| <b>FACET</b>    | Foraminotomy ACDF Cost-Effectiveness Trial |
| <b>FOR</b>      | Posterior Cervical Foraminotomy            |
| <b>NDI</b>      | Neck Disability Index                      |
| <b>SAP</b>      | Statistical Analysis Plan                  |
| <b>VAS</b>      | Visual Analogue Scale                      |
| <b>WAS</b>      | Work Ability Index Scale                   |

36

37

38

39

40

41

42

43

44

45

46

47

48

49

50

51

52

53

54

55

56

57

58

59

60

61

62 **Research aims and hypotheses:**

63 Primary hypotheses:

- 64 - The effectiveness of the FOR technique is noninferior compared with the ACDF technique  
65 - The FOR technique is cost-effective compared with the ACDF technique (a cost-effectiveness  
66 analysis after 2-years will be conducted separately)

67 Secondary hypotheses:

- 68 - The FOR technique will have a lower complication rate compared with the ACDF technique.  
69 - The FOR technique will have lower direct and indirect costs compared with the ACDF  
70 technique.  
71 - The FOR technique is associated with more neck pain in the first 30 days after the surgical  
72 procedure.

73

74 **Study design and treatment allocation:**

75 The FACET study is a prospective, multicenter, investigator-blinded randomized controlled trial with a  
76 follow-up of 2 years. Both the FOR (experimental group) and the ACDF (active control) are established  
77 surgical techniques. The randomization was performed using an independent institute web-based  
78 block randomization design, stratified by center. Blinding of the participant or the surgeon is not  
79 feasible. The data analysis will be performed with blinded data. Assessment of Odom criteria will be  
80 performed by an independent interviewer who is blinded to the treatment allocation.

81 Non-inferiority margin

82 A non-inferiority trial design is chosen to show whether FOR (experimental) has at least as much  
83 efficacy as ACDF (active control) or is worse by an amount less than 10% with regards to a successful  
84 outcome (Odom score) and decrease in arm pain (Visual Analogue Scale (VAS)) after surgery. No  
85 evidence-based non-inferiority margin for this research question exists. Therefore, based on the  
86 assumption that FOR reduces costs, has fewer complications, leads to less work absenteeism, and  
87 leads to higher quality of life, the non-inferiority margin of 10% was chosen, that would justify a  
88 tolerable loss of efficacy.

89

90 Sample size

91 A sample size of 308 patients was calculated that would give the trial 80% power to rule out a  
92 between-group difference in the success rate with an alpha of 0.05, and a drop-out ratio of 10%, and  
93 non-inferiority margin of 10%. During the trial, a lower inclusion rate was observed and several  
94 measures to improve inclusion were taken. This included frequent newsletters, defined instructions for  
95 surgeons to include participants and the enrollment of additional medical centers. Nonetheless, a  
96 delay in inclusion could not be fully alleviated. When also the COVID-pandemic started, with an

97 extreme reduction of non-emergent health care, an interim analysis and post-hoc power calculation  
98 were performed by a statistician who was not involved in the study design.

99 The interim-analysis included participants that completed the 1-year follow-up and those that  
100 completed the 2-year follow-up at that time (the 2-year follow-up is still ongoing, thus not completed for  
101 all patients yet). The analysis included the primary outcome on which the sample size was based on; a  
102 successful Odom score ('excellent' or 'good'). Besides a complete case analysis, additional sensitivity  
103 analyses were performed; a scenario with full cases in which all missing cases were considered to  
104 have an unsuccessful outcome; a scenario with predefined sample sizes (140 participants per group)  
105 with all remaining missing data coded as unsuccessful; and a scenario in which additional participants  
106 in the ACDF group were coded as unsuccessful (stacking the Odds against FOR) until the  
107 noninferiority margin was reached (Figure 1). All scenario's indicated non-inferiority of FOR with a  
108 confidence interval within the predefined delta of 0.1. Therefore, we could conclude that it was safe to  
109 end the inclusion at 86% of the predefined sample size.

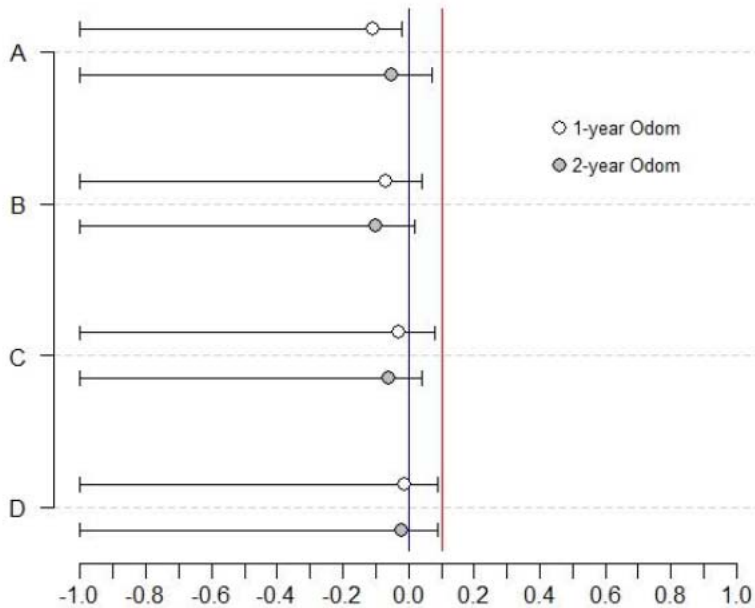

Figure 1. Interim-analyses of non-inferiority.

Point estimate + one-sided 95% confidence interval (CI) are depicted. Different scenarios were calculated for the proportion of a successful primary outcome (Odom score): 86 versus 81 in the FOR and ACDF group after 1-year of follow-up, and 69 versus 60 after 2-years of follow-up, respectively. \*\*the 2-year follow-up is still ongoing and thus not completed for all patients. The red line depicts the non-inferiority margin of 10%.

**(A)** Intention-to-treat analysis with complete cases after 1- and 2-years of follow-up. **(B)** Intention-to-treat analysis with full cases (FOR 119 and ACDF 124), with missing data coded as unsuccessful. **(C)** Analysis with predefined sample sizes (140 patients per group) with missing data coded as unsuccessful **(D)** Scenario where additional patients in the ACDF group were coded as having a successful outcome, until the non-inferiority margin was reached (stacking the odds against FOR).

111

112

113 Post-hoc power analysis

114 In order to estimate the achieved power, post-hoc power analyses were conducted using the complete  
115 cases and full data for both primary outcomes. The number of patients with a successful Odom  
116 score was identical in the two analyses (86 in the FOR group and 81 in the ACDF group), and as  
117 expected the total number of patients was smaller in the complete case than the full data analysis (98  
118 versus 119 in the PCF group and 106 versus 124 in the ACDF group). Using these sample sizes and  
119 the actual achieved proportions of the successful Odom score, two-proportion z-tests with a one-sided  
120 0.05 level of significance were performed. With a noninferiority margin of 10%, the Odom score  
121 achieved a power of 0.98 in the complete case analysis and 0.85 in the full data analysis.

122 For the VAS arm pain at 1-year, there were 195 observations (96 in the FOR group and 99 in the  
123 ACDF group). With the abovementioned conditions, with an assumed standard deviation of 23, the  
124 power of the results was calculated to be 0.86. For the change score in arm pain at 1-year, 192  
125 observations were collected (94 in the FOR group, 98 in the ACDF group). With an assumed standard  
126 deviation of 30, this led to a power of 0,63. All power calculations were performed with a Bonferroni  
127 correction, leading to an Alpha of 0.025.

128

129 Data collection methods\*:

130 Preoperative history is obtained from standard care procedures and includes length, weight, number of  
131 months/years of neck and arm pain, signs and symptoms, other significant illnesses, pain medication  
132 (use of non-steroidal anti-inflammatory drugs) and smoking history. Information about the operative  
133 procedure will be obtained from the medical record of the participant and will include date and type of  
134 procedure, which level was operated, use of implants and occurrence of complications during the  
135 operative procedure. At baseline (i.e. at enrolment, before surgical procedure), participants will fill out  
136 web-based questionnaires. These questionnaires take ~30 min to fill in. The participant will visit the  
137 outpatient clinic 6 weeks after the surgical procedure, in line with standard care. Thereafter, at all  
138 follow-up moments including 1 and 2-years after follow-up, the participant fills out the same  
139 abovementioned questionnaires. An independent interviewer will contact the participants by telephone  
140 at all follow-up moments to assess the Odom criteria. During the complete period of the study, all  
141 adverse events will be reported. Adverse events are defined as undesirable experience occurring to a  
142 participant during the study, whether or not considered related to intervention. The definition of serious  
143 adverse events is in line with the guidelines of the International Council on Harmonization of Technical  
144 Requirements for Registration of Pharmaceuticals for Human Use (ICH).<sup>1</sup>

145

146 Outcome measures:

147 The main primary outcome is the proportion of a successful score ('excellent' or 'good') on the  
148 modified Odom criteria (4-point rating scale) after 1 year of follow-up.<sup>2</sup>

149 The second primary outcome is a postoperative decrease in radiculopathy assessed by the VAS for  
150 self-reported arm pain (0-100; lower scores at 1-year and higher change scores from baseline  
151 indicating a greater decrease in pain).<sup>3</sup>

152 Secondary outcomes include differences in postoperative self-reported VAS-neck pain, quality of life,  
153 assessed with the EuroQol 5 Dimension 5 Level Survey (EQ-5D-5L)<sup>4</sup>, neck disability assessed with  
154 the Neck Disability Index (NDI)<sup>5</sup>, work ability, assessed with the Single-item Work Ability Index (WAI)<sup>6</sup>,  
155 satisfaction with surgery, (serious) adverse events and reoperations.

156

### 157 **Statistical methods: primary study parameters:**

158 Noninferiority of the primary outcomes (a successful Odom score and the decrease of arm pain) after  
159 1-year of follow-up will be assessed in the intention-to-treat population. Noninferiority will be tested  
160 with a two-proportion z-test at a one-sided 0.05 level of significance and noninferiority margin of 10%.  
161 Bonferroni corrections will be applied to adjust for multiple comparisons, leading to an alpha 0.025.  
162 Analyses will be conducted with and without continuity correction.

163

164 Detailed descriptive statistics will be provided for the data collected and one-sided 95% CIs will be  
165 calculated for all relevant estimates. Baseline characteristics will be calculated for the total randomized  
166 patient group and for the full cases. Also, the primary analysis will follow the per protocol principle.  
167 Sensitivity analysis are provided to evaluate robustness of the results.

168

### 169 **Statistical methods: secondary study parameters:**

170 Secondary end points will be analyzed in an exploratory manner after 1-year of follow-up at a two-  
171 sided 95% confidence interval , not adjusted for multiple comparison. T-tests for continuous data and  
172 z-tests for categorical outcomes will be used.

173

174 Additionally, a responder analysis of the secondary outcomes will be conducted, in which the  
175 proportion of patients with a response to treatment will be defined as those with an improvement from  
176 baseline up until 1 year after surgery, reaching or exceeding the predefined threshold of the  
177 prespecified mean clinical important difference (MCID).<sup>7</sup>

178

### 179 **Missing data**

180 Various post-hoc sensitivity analyses will be performed accounting for missing data. This will be done  
181 by simulating different scenarios and calculate the one-sided 95% CIs for: the full cases in which all  
182 missing cases are considered to have an unsuccessful outcome, and the predefined sample sizes in

183 both groups with all remaining data coded as unsuccessful. Additionally, as a measure of robustness,  
184 the fragility index will be calculated, which is the minimum number of patients whose status (primary  
185 outcome) has to change to convert a noninferior outcome to an inferior outcome.<sup>8</sup> This will be done by  
186 adding additional patients with a successful outcome to the ACDF group (thereby stacking the odds  
187 against FOR) until the noninferiority margin is reached.

188

189 **References:**

- 190 1. International Conference on Harmonisation of Technical Requirements for Registration of  
191 Pharmaceuticals for Human Use. *ICH harmonized tripartite guideline: Clinical safety data  
192 management: Definitions and standards for expedited reporting E2A*. Step 4 version ed.  
193 October.1994.[http://www.ich.org/fileadmin/Public\\_Web\\_Site/ICH\\_Products/Guidelines/Efficacy/E2A/Step4/E2A\\_Guideline.pdf](http://www.ich.org/fileadmin/Public_Web_Site/ICH_Products/Guidelines/Efficacy/E2A/Step4/E2A_Guideline.pdf) Accessed on 2<sup>nd</sup> of August, 2022.
- 194 2. Broekema AEH, Molenberg R, Kuijlen JMA, Groen RJM, Reneman MF, Soer R. The Odom  
195 Criteria: Validated at Last: A Clinimetric Evaluation in Cervical Spine Surgery. *J Bone Joint  
196 Surg Am*. 2019;101(14):1301–8.
- 197 3. Huskisson EC. Measurement of pain. *The Lancet*. 1974;304(7889). doi:10.1016/S0140-  
198 6736(74)90884-8
- 199 4. Soer R, Reneman MF, Speijer BLGN, Coppes MH, Vroomen PCAJ. Clinimetric properties of  
200 the EuroQol-5D in patients with chronic low back pain. *Spine J*. 2012;12:1035-9.
- 201 5. Jorritsma W, De Vries GE, Dijkstra PU, Geertzen JHB, Reneman MF. Neck Pain and  
202 Disability Scale and Neck Disability Index: Validity of Dutch language versions. *Eur Spine J*.  
203 2012;21:93-100.
- 204 6. De Zwart BCH, Frings-Dresen MHW, Van Duivenbooden JC. Test-retest reliability of the Work  
205 Ability Index questionnaire. *Occup Med*. 2002;52:177-81.
- 206 7. Broekema AEH, Kuijlen JMA, Lesman-Leegte GAT, et al. Study protocol for a randomised  
207 controlled multicentre study: The Foraminotomy ACDF Cost-Effectiveness Trial (FACET) in  
208 patients with cervical radiculopathy. *BMJ Open*. 2017;7(1):e012829.
- 209 8. Tignanelli CJ, Napolitano LM. The Fragility Index in Randomized Clinical Trials as a Means of  
210 Optimizing Patient Care. *JAMA Surg*. 2019;154(1):74–9.
- 211

212

213

214

215

216

217

218

219 **Summary of changes in Statistical Analysis Plan**

|                                              | <b>Original protocol</b>                                                                                                                                                                                                      | <b>Published protocol and present report</b>                                                                                                                                                                                                                                                                                                                                                                                                                                                                                                                                                                                       | <b>Summary of changes</b>                                                                                                  |
|----------------------------------------------|-------------------------------------------------------------------------------------------------------------------------------------------------------------------------------------------------------------------------------|------------------------------------------------------------------------------------------------------------------------------------------------------------------------------------------------------------------------------------------------------------------------------------------------------------------------------------------------------------------------------------------------------------------------------------------------------------------------------------------------------------------------------------------------------------------------------------------------------------------------------------|----------------------------------------------------------------------------------------------------------------------------|
| <b>Primary hypothesis</b>                    | The effectiveness of the FOR technique is noninferior compared with the ACDF technique                                                                                                                                        | The effectiveness of the FOR technique is noninferior compared with the ACDF technique                                                                                                                                                                                                                                                                                                                                                                                                                                                                                                                                             | No changes                                                                                                                 |
| <b>Study design and treatment allocation</b> |                                                                                                                                                                                                                               |                                                                                                                                                                                                                                                                                                                                                                                                                                                                                                                                                                                                                                    |                                                                                                                            |
| Noninferiority margin                        | A non-inferiority trial design is chosen to show whether FOR has at least as much efficacy as the ACDF technique or is worse by an amount <10% with regard to the primary outcome parameters.                                 | A non-inferiority trial design is chosen to show whether FOR has at least as much efficacy as the ACDF technique or is worse by an amount <10% with regard to the primary outcome parameters.                                                                                                                                                                                                                                                                                                                                                                                                                                      | No changes                                                                                                                 |
| Sample size                                  | A sample size of 308 patients was calculated that would give the trial 80% power to rule out a between-group difference in the success rate with an alpha of 0.05, a drop-out ratio of 10%, and noninferiority margin of 10%. | The interim-analysis included participants that completed the 1-year follow-up and participants that included the 2-year follow-up at that time (the 2-year follow-up is still ongoing). The analysis was based on the prespecified primary outcome a successful Odom score ('excellent' or 'good'), on which the initial sample size was also based. Besides a 'complete case' analysis, additional sensitivity analyses were performed. All scenario's indicated non-inferiority of posterior cervical foraminotomy with a confidence interval within the predefined delta of 0.1. Therefore, we could conclude that it was safe | 265 patients were included in the trial (86% of the predefined sample size) and 243 patients received the final treatment. |



|                           |                                                                                                                                                                                                                                                                                                                                                                                                             |                                                                                                                                                                                                                                                                                                                                                                                                                                            |                                                                                                                                               |
|---------------------------|-------------------------------------------------------------------------------------------------------------------------------------------------------------------------------------------------------------------------------------------------------------------------------------------------------------------------------------------------------------------------------------------------------------|--------------------------------------------------------------------------------------------------------------------------------------------------------------------------------------------------------------------------------------------------------------------------------------------------------------------------------------------------------------------------------------------------------------------------------------------|-----------------------------------------------------------------------------------------------------------------------------------------------|
|                           |                                                                                                                                                                                                                                                                                                                                                                                                             | to end the inclusion at 86% of the predefined sample size (265 patients).                                                                                                                                                                                                                                                                                                                                                                  |                                                                                                                                               |
| <b>Outcome measures</b>   |                                                                                                                                                                                                                                                                                                                                                                                                             |                                                                                                                                                                                                                                                                                                                                                                                                                                            |                                                                                                                                               |
| <b>Primary outcome</b>    | The primary outcome is 'Operative success' defined as the postoperative decrease in radiculopathy assessed by the VAS for self-reported arm pain, between the patients operated with the FOR technique and with the ACDF technique during 24 months of follow-up. Additionally, 'Patient success' will be assessed by the modified Odom criteria, which address physical symptoms and socioeconomic status. | The main primary outcome is the proportion of a successful score ('excellent' or 'good') on the modified Odom criteria (4-point rating scale) after 1 year of follow-up. <sup>2</sup><br>The second primary outcome is a postoperative decrease in radiculopathy assessed by the VAS for self-reported arm pain (0-100; lower scores at 1-year and higher change scores from baseline indicating a greater decrease in pain). <sup>3</sup> | The successful Odom score after 1-year of follow-up ¥ is treated as our main primary outcome and the VAS-arm as our second primary outcome.** |
| <b>Secondary outcomes</b> | Secondary outcomes include differences in postoperative self-reported VAS-neck pain, quality of life, assessed with the EuroQol 5 Dimension 5 Level Survey (EQ-5D-5L), neck disability assessed with the Neck Disability Index (NDI), work ability, assessed with the Single-item Work Ability Index (WAI), satisfaction with surgery, (serious) adverse events and reoperations.                           | Secondary outcomes include self-reported VAS-neck pain, quality of life, assessed with the EuroQol 5 Dimension 5 Level Survey (EQ-5D-5L), neck disability assessed with the Neck Disability Index (NDI), work ability, assessed with the Single-item Work Ability Index (WAI), (serious) adverse events and reoperations.                                                                                                                  | No changes                                                                                                                                    |

|                                                  |                                                                                                                                                                                                                                                                                                                                                                                                                                                                                             |                                                                                                                                                                                                                                                                                                                                                                                                                                                                                                                                                         |                                                                                                                                                                                                                                            |
|--------------------------------------------------|---------------------------------------------------------------------------------------------------------------------------------------------------------------------------------------------------------------------------------------------------------------------------------------------------------------------------------------------------------------------------------------------------------------------------------------------------------------------------------------------|---------------------------------------------------------------------------------------------------------------------------------------------------------------------------------------------------------------------------------------------------------------------------------------------------------------------------------------------------------------------------------------------------------------------------------------------------------------------------------------------------------------------------------------------------------|--------------------------------------------------------------------------------------------------------------------------------------------------------------------------------------------------------------------------------------------|
| <b>Statistical analysis of primary outcome</b>   | Detailed descriptive statistics will be provided for the data collected and 95% CIs will be calculated for all relevant estimates. Clinical follow-up data will be analysed by analysis of covariance or generalised model alternatives for categorical or semiquantitative data. Changes within the treatment groups over time, as well as differences between groups, will be assessed by intention-to-treat analyses. Also, the primary analysis will follow the per protocol principle. | Detailed descriptive statistics will be provided for the data collected and <b>one-sided</b> 95% CIs will be calculated for all relevant estimates. Clinical follow-up data <b>after 1-year</b> is analyzed using a two-proportion z-test at a one-sided 0.05 level of significance and noninferiority margin of 10%. Bonferroni correction will be applied to adjust for multiple comparisons. Changes within the treatment groups will be assessed by intention-to-treat analyses. Also, the primary analysis will follow the per protocol principle. | "One-sided" is added to the 95% CI. Besides the longitudinal analysis after 2 years, the clinical follow-up data will be analyzed after 1-year of follow-up with a two-proportion z-test (longitudinal analysis after 2 years is planned). |
| <b>Statistical analysis of secondary outcome</b> | Secondary end points will be analysed in an exploratory manner at a two-sided significance level of 5%. Safety and tolerability parameters will be analysed descriptively. Analysis of time-dependent probabilities of critical events will be performed using the Kaplan-Meier method. Furthermore, multivariate event analyses will be performed using Cox proportional hazard regression models.                                                                                         | Secondary end points will be analyzed in an exploratory manner after 1-year of follow-up at a two-sided 90% confidence interval (equivalent to a one-sided 95% confidence interval). T-tests for continuous data and z-tests for categorical outcomes will be used. Additionally, a responder analysis of the secondary outcomes will be conducted.                                                                                                                                                                                                     | t-test are used for continuous outcomes and z-tests for categorical outcomes. Also a responder analysis of the secondary outcomes is performed using the predefined MCIDs.                                                                 |
| <b>Missing data</b>                              | For the purpose of a supportive sensitivity                                                                                                                                                                                                                                                                                                                                                                                                                                                 | Various post-hoc sensitivity analyses will                                                                                                                                                                                                                                                                                                                                                                                                                                                                                                              | Various post-hoc sensitivity analyses are performed                                                                                                                                                                                        |

|              |                                                                                                          |                                                                  |                                                |
|--------------|----------------------------------------------------------------------------------------------------------|------------------------------------------------------------------|------------------------------------------------|
|              | analysis, multiple imputation procedures will be applied.                                                | be performed accounting for missing data.                        | regarding the missing data.                    |
| <b>Other</b> | British English is used in our original statistical analysis plan (according to the published protocol). | American English is used in our final statistical analysis plan. | Change of British English to American English. |

220

221

222 **\*\*Outcome measures: primary outcomes:**

223 In the original SAP, the primary end point was defined as a successful Odom score as well as  
 224 postoperative decrease of self-reported arm pain on the VAS-arm scale. It was stated in our original  
 225 SAP that *“both items will be analyzed as appropriate depending on data distribution with a one-sided  
 226 0.05 level of significance (non-inferiority)”*. We consider the FOR technique non-inferior if the technique  
 227 has at least as much efficacy (decreased VAS arm pain and the good/excellent scores on Odom  
 228 criteria) as the ACDF technique or is worse by an amount <10%.

229 In our final SAP we treat the successful Odom score as our main primary outcome and the VAS-arm  
 230 as our second primary outcome.

231 We define the Odom criteria as main primary outcome because the sample size was calculated based  
 232 on this outcome measure. Furthermore, the Odom criteria have been widely used in studies regarding  
 233 different cervical procedures and are validated, assessing improvement of physical symptoms as well  
 234 as the ability to perform daily activities (thus, the Odom is a more extended outcome measure than the  
 235 VAS-arm score, assessing improvement of physical symptoms only).

236 For the second primary outcome, the decrease in arm pain, we chose to report both the arm pain  
 237 score at 1 year and the change from baseline. This decision was made because in the original protocol  
 238 the method of measuring the decrease in arm pain was not consistently defined. In our opinion,  
 239 reporting both the 1 year result and the change score leads to optimal transparency of our results. To  
 240 adjust for the multiple comparisons in the primary outcome, Bonferroni corrections were applied to all  
 241 results.

242

243 **¥ Analyses after 1-year of follow-up. Reason for change:**

244 We had initially planned to report the results after all the participants completed the 2 years of follow-  
 245 up. However, we decided to also report our results after 1-year of follow-up, because of the following  
 246 reasons;

- 247 - Due to a lower inclusion rate than anticipated, partly due to the COVID-pandemic, the sample  
 248 size of 308 patients was not reached and an interim-analysis was performed. The interim-  
 249 analysis indicated a non-inferior outcome of FOR compared to ACDF at 86% of the

250 predefined sample size, with a low risk of type II error. Subsequently, robustness of this result  
251 was confirmed with different post-hoc sensitivity analyses. Because of the robustness of this  
252 result, and the existing controversy in spine surgery regarding treatment choice for patients  
253 with cervical radiculopathy (FOR or ACDF), we decided that our result as such would be of  
254 direct value for clinicians. As FOR and ACDF are widely used interventions in spine surgery,  
255 and the choice between the two is commonly encountered among surgeons and patients with  
256 cervical radiculopathy, the noninferiority of FOR compared to ACDF after one year can  
257 already be used to improve patient counselling and enhance shared decision making by  
258 surgeons and patients.  
259 - The initial plan to do the longitudinal analysis after 2-years of follow-up is not changed.

260 **¶ Statistical analysis of primary outcome. Reason for change:**

261 We chose to present our results after 1-year using basic statistical analysis, to communicate our  
262 results in a prompt and straightforward fashion. As such, the results are good to interpret for clinicians  
263 and the robustness was clearly indicated with various sensitivity analyses. After 2-years of follow-up a  
264 longitudinal analysis and cost-effectiveness analysis will be performed.

265

266

267

268

269

270
