# Supplementary material
Source: PubMed Central journal article supplement (PMC9679957)
Supplement: jamaneurol-e224208-s004.pdf [file jamaneurol-e224208-s004.pdf]

## Supplemental Online Content

Broekema AEH, Simões de Souza NF, Soer R, et al; the FACET investigators. Noninferiority of posterior cervical foraminotomy vs anterior cervical discectomy with fusion for procedural success and reduction in arm pain among patients with cervical radiculopathy at 1 year: the FACET randomized clinical trial. *JAMA Neurol*. Published online November 21, 2022. doi:10.1001/jamaneurol.2022.4208

**eTable 1.** Surgical characteristics in the intention-to-treat population

**eTable 2.** Post-hoc power calculations

**eTable 3.** Baseline characteristics of all randomized patients

**eTable 4.** Specification of comorbidities in all randomized patients

**eTable 5.** Baseline characteristics neurological examination

**eTable 6.** Responder analyses regarding the MCID

**eTable 7.** Specification of adverse events in the intention-to-treat population

**eTable 8.** Reoperations within 1-year of follow-up

**eMethods.** Supplementary questionnaires

This supplemental material has been provided by the authors to give readers additional information about their work.

**eTable 1. Surgical characteristics in the intention-to-treat population**

|                                                                | Posterior surgery<br>(n=119) | Anterior surgery<br>(n=124) | Mean difference posterior<br>versus anterior (95% CI) | <i>P</i> -value |
|----------------------------------------------------------------|------------------------------|-----------------------------|-------------------------------------------------------|-----------------|
| <b>Surgery according to randomization</b>                      |                              |                             | -                                                     | -               |
| Yes                                                            | 117                          | 123                         | -                                                     | -               |
| No                                                             | 2                            | 1                           | -                                                     | -               |
| <b>Antibiotic prophylaxis</b>                                  | 119 (100)                    | 124 (100)                   | -                                                     | -               |
| <b>Operation time, mean (SD), m</b>                            |                              |                             |                                                       |                 |
| Including anesthesia                                           | 106.8 (30.8)                 | 113.2 (35.2)                | -6.4 (-14.8 to 2.0)                                   | 0.1             |
| Including positioning time, w/o anesthesia                     | 77.3 (23.2)                  | 86.3 (30.0)                 | -9.0 (-16.3 to -1.7)                                  | <0.05           |
| Incision to end of surgery                                     | 61.6 (22.6)                  | 75.0 (27.0)                 | -13.0 (-19.9 to -6.9)                                 | <0.001          |
| <b>Surgical specifications - Anterior surgery<sup>a</sup></b>  |                              |                             |                                                       |                 |
| <b>No. of patients</b>                                         | 2                            | 123                         | -                                                     | -               |
| <b>Operated level</b>                                          |                              |                             | -                                                     | -               |
| C5-C6                                                          | 2 (100)                      | 62 (50)                     | -                                                     | -               |
| C6-C7                                                          | -                            | 61 (50)                     | -                                                     | -               |
| <b>Side skin incision</b>                                      |                              |                             | -                                                     | -               |
| Right                                                          | 2 (100)                      | 103 (84)                    | -                                                     | -               |
| Left                                                           |                              | 19 (16)                     | -                                                     | -               |
| <b>Type of spacer</b>                                          |                              |                             | -                                                     | -               |
| Bone cement                                                    | -                            | 31 (25)                     | -                                                     | -               |
| PEEK cage                                                      | -                            | 24 (20)                     | -                                                     | -               |
| Titanium cage                                                  | 1 (50)                       | 51 (41)                     | -                                                     | -               |
| Titanium cage with spikes                                      | 1 (50)                       | 17 (14)                     | -                                                     | -               |
| <b>Surgical specifications - Posterior surgery<sup>a</sup></b> |                              |                             |                                                       |                 |
| <b>No. of patients</b>                                         | 117                          | 1                           | -                                                     | -               |
| <b>Nerve root decompressed</b>                                 |                              |                             | -                                                     | -               |
| C5                                                             | 3 (3)                        | -                           | -                                                     | -               |
| C6                                                             | 55 (47)                      | -                           | -                                                     | -               |
| C7                                                             | 59 (50)                      | 1 (100)                     | -                                                     | -               |
| <b>Removal venous plexus</b>                                   |                              |                             | -                                                     | -               |
| No                                                             | 39 (49)                      | 1 (100)                     | -                                                     | -               |
| Yes                                                            | 60 (59)                      | -                           | -                                                     | -               |
| <b>Removal discogenic component</b>                            |                              |                             | -                                                     | -               |
| No                                                             | 95 (80)                      | -                           | -                                                     | -               |
| Yes                                                            | 22 (19)                      | -                           | -                                                     | -               |

*Number of patients (no.), Polyetheretherketone (PEEK).*

<sup>a</sup>Percentages may not total 100, because of rounding. There were 2 cross-overs from the randomized posterior surgery group that underwent anterior surgery, and 1 cross-over from the anterior surgery group that underwent posterior surgery.

Data was missing for 1 patient in the anterior surgery group for side of skin incision; 16 patients in the posterior surgery group for removal of the venous plexus.

## eTable 2. Post-hoc power calculations

### Non-Inferiority Tests for the Difference Between Two Proportions

#### Numeric Results – Success rate according to Odom criteria for complete case analysis

Solve For: **Power**  
 Test Statistic: Z-Test with Pooled Variance  
 Hypotheses:  $H_0: P_1 - P_2 \leq \delta_0$  vs.  $H_1: P_1 - P_2 > \delta_0$

| Power* | N1 | N2  | N   | Ref.<br>P2 | P1 H0<br>P1.0 | P1 H1<br>P1.1 | NI Diff<br>$\delta_0$ | Diff<br>$\delta_1$ | Alpha              |
|--------|----|-----|-----|------------|---------------|---------------|-----------------------|--------------------|--------------------|
| 0,9725 | 98 | 106 | 204 | 0,76       | 0,66          | 0,87          | -0,1                  | 0,11               | 0,025 <sup>a</sup> |
| 0,9874 | 98 | 106 | 204 | 0,76       | 0,66          | 0,87          | -0,1                  | 0,11               | 0,050 <sup>b</sup> |

\* Power was computed using the normal approximation method.

|            |                                                                                                                                     |
|------------|-------------------------------------------------------------------------------------------------------------------------------------|
| Power      | The probability of rejecting a false null hypothesis when the alternative hypothesis is true.                                       |
| N1 and N2  | The number of items sampled from each population.                                                                                   |
| N          | The total sample size. $N = N_1 + N_2$ .                                                                                            |
| P2         | The proportion for group 2, which is the standard, reference, or control group.                                                     |
| P1         | The proportion for group 1, which is the treatment or experimental group.                                                           |
| P1.0       | The smallest group 1 proportion that still yields a non-inferiority conclusion. $P1.0 = P1 H_0$ .                                   |
| P1.1       | The proportion for group 1 under the alternative hypothesis at which power and sample size calculations are made. $P1.1 = P1 H_1$ . |
| $\delta_0$ | The non-inferiority difference under $H_0$ . $\delta_0 = P1.0 - P2$ .                                                               |
| $\delta_1$ | The non-inferiority difference assumed by the alternative hypothesis, $H_1$ . $\delta_1 = P1.1 - P2$ .                              |
| Alpha      | The probability of rejecting a true null hypothesis.                                                                                |
| a          | With Bonferroni correction                                                                                                          |
| b          | Without Bonferroni correction                                                                                                       |

#### Numeric Results – Success rate according to Odom criteria for full case analysis

Solve For: **Power**  
 Test Statistic: Z-Test with Pooled Variance  
 Hypotheses:  $H_0: P_1 - P_2 \leq \delta_0$  vs.  $H_1: P_1 - P_2 > \delta_0$

| Power* | N1  | N2  | N   | Ref.<br>P2 | P1 H0<br>P1.0 | P1 H1<br>P1.1 | NI Diff<br>$\delta_0$ | Diff<br>$\delta_1$ | Alpha              |
|--------|-----|-----|-----|------------|---------------|---------------|-----------------------|--------------------|--------------------|
| 0,8143 | 119 | 124 | 243 | 0,65       | 0,55          | 0,72          | -0,1                  | 0,07               | 0,025 <sup>a</sup> |
| 0,8869 | 119 | 124 | 243 | 0,65       | 0,55          | 0,72          | -0,1                  | 0,07               | 0,050 <sup>b</sup> |

\* Power was computed using the normal approximation method.

|            |                                                                                                                                     |
|------------|-------------------------------------------------------------------------------------------------------------------------------------|
| Power      | The probability of rejecting a false null hypothesis when the alternative hypothesis is true.                                       |
| N1 and N2  | The number of items sampled from each population.                                                                                   |
| N          | The total sample size. $N = N_1 + N_2$ .                                                                                            |
| P2         | The proportion for group 2, which is the standard, reference, or control group.                                                     |
| P1         | The proportion for group 1, which is the treatment or experimental group.                                                           |
| P1.0       | The smallest group 1 proportion that still yields a non-inferiority conclusion. $P1.0 = P1 H_0$ .                                   |
| P1.1       | The proportion for group 1 under the alternative hypothesis at which power and sample size calculations are made. $P1.1 = P1 H_1$ . |
| $\delta_0$ | The non-inferiority difference under $H_0$ . $\delta_0 = P1.0 - P2$ .                                                               |
| $\delta_1$ | The non-inferiority difference assumed by the alternative hypothesis, $H_1$ . $\delta_1 = P1.1 - P2$ .                              |
| Alpha      | The probability of rejecting a true null hypothesis.                                                                                |
| a          | With Bonferroni correction                                                                                                          |
| b          | Without Bonferroni correction                                                                                                       |

## Two-Sample T-Tests for Non-Inferiority Assuming Equal Variance

### Numeric Results for an Equal-Variance T-Test – Visual Analogue Scale for Arm Pain at 1-year

Solve For: **Power**  
 Difference:  $\delta = \mu_1 - \mu_2 = \mu_T - \mu_R$   
 Higher Means Are: Worse  
 Hypotheses:  $H_0: \delta \geq \text{NIM}$  vs.  $H_1: \delta < \text{NIM}$

| Power   | N1 | N2 | N   | NIM | $\delta$ | $\sigma$ | Alpha              |
|---------|----|----|-----|-----|----------|----------|--------------------|
| 0,85548 | 99 | 96 | 195 | 10  | 0        | 23       | 0,025 <sup>a</sup> |
| 0,91618 | 99 | 96 | 195 | 10  | 0        | 23       | 0,050 <sup>b</sup> |

Power The probability of rejecting a false null hypothesis when the alternative hypothesis is true.  
 N1 and N2 The number of items sampled from each population.  
 N The total sample size.  $N = N_1 + N_2$ .  
 NIM The magnitude of the margin of non-inferiority. Since higher means are worse, this value is positive and is the distance above the reference mean that is still considered non-inferior.  
 $\delta$  The difference between the treatment and reference means at which power and sample size calculations are made.  $\delta = \mu_1 - \mu_2 = \mu_T - \mu_R$ .  
 $\sigma$  The assumed population standard deviation for each of the two groups.  
 Alpha The probability of rejecting a true null hypothesis.  
 a With Bonferroni correction  
 b Without Bonferroni correction

## Two-Sample T-Tests for Non-Inferiority Assuming Equal Variance

### Numeric Results for an Equal-Variance T-Test – Decrease in Arm Pain at 1-year (0-100 scale)

Solve For: **Power**  
 Difference:  $\delta = \mu_1 - \mu_2 = \mu_T - \mu_R$   
 Higher Means Are: Better  
 Hypotheses:  $H_0: \delta \leq -\text{NIM}$  vs.  $H_1: \delta > -\text{NIM}$

| Power   | N1 | N2 | N   | -NIM | $\delta$ | $\sigma$ | Alpha              |
|---------|----|----|-----|------|----------|----------|--------------------|
| 0,63204 | 94 | 98 | 192 | -10  | 0        | 30       | 0,025 <sup>a</sup> |
| 0,74403 | 94 | 98 | 192 | -10  | 0        | 30       | 0,050 <sup>b</sup> |

Power The probability of rejecting a false null hypothesis when the alternative hypothesis is true.  
 N1 and N2 The number of items sampled from each population.  
 N The total sample size.  $N = N_1 + N_2$ .  
 -NIM The magnitude and direction of the margin of non-inferiority. Since higher means are better, this value is negative and is the distance below the reference mean that is still considered non-inferior.  
 $\delta$  The difference between the treatment and reference means at which power and sample size calculations are made.  $\delta = \mu_1 - \mu_2 = \mu_T - \mu_R$ .  
 $\sigma$  The assumed population standard deviation for each of the two groups.  
 Alpha The probability of rejecting a true null hypothesis.  
 a With Bonferroni correction  
 b Without Bonferroni correction

**eTable 3. Baseline characteristics of all randomized patients<sup>a</sup>**

| Characteristic                                    | Posterior surgery (n=132) | Anterior surgery (n=133) |
|---------------------------------------------------|---------------------------|--------------------------|
| Age, mean (SD), y                                 | 51.3 (8.5)                | 51.1 (8.2)               |
| Sex – no. (%)                                     |                           |                          |
| Female                                            | 71 (54)                   | 61 (46)                  |
| Male                                              | 61 (46)                   | 72 (54)                  |
| Body Mass Index, median (IQR) <sup>b</sup>        | 27 (24-30)                | 27 (24-31)               |
| Level of radiculopathy– no. (%)                   |                           |                          |
| C5 – right                                        | 1 (1)                     | 2 (2)                    |
| C5 – left                                         | 1 (1)                     | -                        |
| C6 – right                                        | 34 (26)                   | 37 (28)                  |
| C6 –left                                          | 32 (24)                   | 24 (18)                  |
| C7 – right                                        | 24 (18)                   | 28 (21)                  |
| C7 – left                                         | 39 (30)                   | 42 (32)                  |
| Symptom duration in weeks, median (IQR), wk       | 31 (25-52)                | 32 (20-52)               |
| ASA classification – no. (%) <sup>c</sup>         |                           |                          |
| ASA I                                             | 60 (46)                   | 70 (53)                  |
| ASA II                                            | 65 (50)                   | 55 (42)                  |
| ASA III                                           | 6 (5)                     | 6 (5)                    |
| Current smoker – no. (%)                          | 58 (46)                   | 49 (38)                  |
| Use of NSAIDs – no. (%)                           | 43 (33)                   | 39 (30)                  |
| Radiological characteristics – no. (%)            |                           |                          |
| Discogenic (soft disc)                            | 54 (41)                   | 42 (32)                  |
| Spondylotic                                       | 14 (11)                   | 14 (11)                  |
| Combined discogenic and spondylotic               | 63 (48)                   | 74 (57)                  |
| Clinical characteristics – no. (%)                |                           |                          |
| Radiating arm and neck pain                       | 61 (47)                   | 64 (48)                  |
| Radiating arm pain only                           | 70 (53)                   | 69 (52)                  |
| Loss of strength                                  | 48 (37)                   | 53 (40)                  |
| Loss of sensibility                               | 87 (66)                   | 86 (65)                  |
| Tingling in fingers or hand                       | 103 (79)                  | 114 (86)                 |
| Comorbidities - no. (%)                           | 72 (55)                   | 61 (46)                  |
| Specification of comorbidities - no. <sup>d</sup> |                           |                          |
| Cardiovascular                                    | 39                        | 30                       |
| Pulmonary                                         | 23                        | 23                       |
| Endocrine                                         | 18                        | 21                       |
| Musculoskeletal                                   | 16                        | 14                       |
| Gastrointestinal and liver                        | 7                         | 10                       |
| Neurological                                      | 2                         | 11                       |
| Thrombo-embolic                                   | 7                         | 4                        |
| Psychiatric                                       | 3                         | 1                        |
| Oncological                                       | 4                         | 3                        |
| Nephrological                                     | 2                         | 1                        |
| Clinically relevant other                         | 4                         | 5                        |

American Society of Anesthesiologist classification (ASA), Inter Quartile Range (IQR), No. (number of patients), Non-Steroidal Anti-Inflammatory Drug (NSAID).

<sup>a</sup> Plus-minus values are means ± standard deviation. Percentages may not total 100, because of rounding. Data was missing for Body Mass Index of 2 patients in the posterior- and 2 in the anterior surgery group; level plus side of radiculopathy, duration of symptoms, clinical characteristics, and comorbidities of 1 patient in the posterior surgery group; ASA-classification of 1 patient in the posterior- and 2 in the anterior surgery group; smoking status of 7 in the posterior- and 4 in the anterior surgery group; NSAID usage of 2 in the posterior- and 3 in the anterior surgery group; radiological characteristics of 1 in the posterior- and 3 in the anterior surgery group.

<sup>b</sup> Body Mass Index is the weight in kilograms divided by the square of the height in meters.

<sup>c</sup> The classification system of ASA ranges from I to VI, where higher classes indicate a greater risk. No patients had an ASA IV or VI classification.

<sup>d</sup> The specification of comorbidities is given on event-level (in contrast to patient-level). Therefore no percentages are given, since several patients had multiple comorbidities. See *Supplementary table S2.* for an overview on all the clinically relevant other comorbidities.

**eTable 4. Specification of comorbidities in all randomized patients**

| Comorbidities                           | Posterior surgery (n=132) | Anterior surgery (n=133) |
|-----------------------------------------|---------------------------|--------------------------|
| <b>Cardiovascular</b>                   |                           |                          |
| Hypertension                            | 23                        | 15                       |
| Myocardial infarction                   | 7                         | 4                        |
| Cardiomyopathy                          | 2                         | 2                        |
| Angina pectoris                         | 0                         | 2                        |
| Aortic valve stenosis                   | 1                         | 0                        |
| AVNRT ablation                          | 1                         | 0                        |
| Cardiac arrhythmia                      | 0                         | 1                        |
| Amaurosis fugax                         | 0                         | 1                        |
| Brugada syndrome                        | 0                         | 1                        |
| Hypercholesterolemia                    | 3                         | 1                        |
| Paroxysmal atrial fibrillation          | 2                         | 0                        |
| Acute pericarditis                      | 0                         | 1                        |
| <b>Total</b>                            | <b>39</b>                 | <b>30</b>                |
| <b>Lung</b>                             |                           |                          |
| Unspecified                             | 23                        | 22                       |
| Sleep apnea                             | 0                         | 1                        |
| <b>Total</b>                            | <b>22</b>                 | <b>23</b>                |
| <b>Oncological</b>                      |                           |                          |
| Hepatocellular carcinoma                | 0                         | 1                        |
| Acute leukemia                          | 0                         | 1                        |
| Hodgkin disease                         | 1                         | 0                        |
| Cervix carcinoma                        | 1                         | 0                        |
| Mamma carcinoma                         | 1                         | 0                        |
| Melanoma                                | 1                         | 0                        |
| Morbus. Bowen                           | 0                         | 1                        |
| <b>Total</b>                            | <b>4</b>                  | <b>3</b>                 |
| <b>Neurological</b>                     |                           |                          |
| Migraine                                | 1                         | 1                        |
| Epilepsy                                | 0                         | 2                        |
| Cluster headache                        | 1                         | 0                        |
| Torticollis                             | 0                         | 1                        |
| Carpal tunnel syndrome                  | 0                         | 6                        |
| Trigeminal neuralgia                    | 0                         | 1                        |
| <b>Total</b>                            | <b>2</b>                  | <b>11</b>                |
| <b>Musculoskeletal</b>                  |                           |                          |
| Rotator cuff repair                     | 1                         | 0                        |
| Polymyalgia rheumatica                  | 1                         | 0                        |
| Lumbar discectomy                       | 2                         | 2                        |
| Lumbar spondylolisthesis                | 1                         | 2                        |
| Fibromyalgia                            | 3                         | 1                        |
| Arthritis                               | 2                         | 1                        |
| Arthrosis                               | 0                         | 1                        |
| Multifactorial generalized chronic pain | 0                         | 1                        |
| Muscle weakness                         | 0                         | 1                        |
| Morbus Bechterew                        | 1                         | 1                        |
| Connective tissue disease               | 4                         | 4                        |
| Costoclavicular depression syndrome     | 1                         | 0                        |
| <b>Total</b>                            | <b>16</b>                 | <b>14</b>                |
| <b>Gastro-intestinal</b>                |                           |                          |
| Esophagitis                             | 2                         | 3                        |

|                                  |           |           |
|----------------------------------|-----------|-----------|
| Liver disease                    | 0         | 3         |
| Celiac disease                   | 0         | 1         |
| Colitis ulcerosa                 | 2         | 0         |
| Crohn disease                    | 0         | 1         |
| Irritable bowel syndrome         | 0         | 1         |
| Barrett syndrome                 | 1         | 0         |
| Biliary pancreatitis             | 1         | 0         |
| Helicobacter pylori eradication  | 0         | 1         |
| Cholecystectomy                  | 1         | 0         |
| <b>Total</b>                     | <b>7</b>  | <b>10</b> |
| <b>Kidney</b>                    |           |           |
| Chronic kidney disease           | 1         | 1         |
| Pyelonephritis                   | 1         | 0         |
| <b>Total</b>                     | <b>2</b>  | <b>1</b>  |
| <b>Endocrine</b>                 |           |           |
| Anemia                           | 0         | 2         |
| Gout                             | 0         | 1         |
| Hashimoto                        | 1         | 0         |
| Hemithyroidectomy                | 0         | 1         |
| Hemochromatosis                  | 0         | 1         |
| Hyperthyroidism                  | 3         | 0         |
| Hypothyroidism                   | 1         | 1         |
| Lyme disease                     | 0         | 1         |
| Chronic hepatitis B.             | 0         | 2         |
| Vitamin B deficiency             | 0         | 2         |
| Diabetes mellitus                | 13        | 10        |
| <b>Total</b>                     | <b>18</b> | <b>21</b> |
| <b>Psychiatric</b>               |           |           |
| Anxiety disorder                 | 2         | 0         |
| Depression                       | 0         | 1         |
| Starting dementia                | 1         | 0         |
| <b>Total</b>                     | <b>3</b>  | <b>1</b>  |
| <b>Thrombo-embolic disease</b>   |           |           |
| Deep venous thrombosis           | 3         | 1         |
| Cerebrovascular disease          | 0         | 2         |
| Stroke                           | 0         | 1         |
| Pulmonary embolus                | 4         | 0         |
| <b>Total</b>                     | <b>7</b>  | <b>4</b>  |
| <b>Clinically relevant other</b> |           |           |
| Peripheral vascular disease      | 3         | 2         |
| Abscesses                        | 0         | 1         |
| Idiopathic thrombotic purpura    | 0         | 1         |
| Epicondylitis lateralis          | 1         | 1         |
| <b>Total</b>                     | <b>4</b>  | <b>5</b>  |

*Atrio-Ventricular Nodal Re-entry Tachycardia (AVNRT), Obstructive sleep apnea syndrome (OSAS),*

This specification of comorbidities is given on event-level (not patient-level). Therefore no percentages are given, since several patients had multiple comorbidities.



**eTable 5. Baseline characteristics neurological examination**

|                                                  | Posterior surgery (n=119) | Anterior surgery (n=124) |
|--------------------------------------------------|---------------------------|--------------------------|
| <b>Sensibility disorder upper limb – no. (%)</b> | 80 (68)                   | 87 (71)                  |
| Dermatome – no.                                  |                           |                          |
| C5                                               | 2/80                      | 0/87                     |
| C6                                               | 34/80                     | 39/87                    |
| C7                                               | 39/80                     | 42/87                    |
| Atypical                                         | 5/80                      | 5/87                     |
| <b>Muscle atrophy – no. (%)</b>                  |                           |                          |
| Yes                                              | 4 (5)                     | 4 (4)                    |
| No                                               | 77 (95)                   | 91 (96)                  |
| <b>Loss of strength – no. (%)</b>                |                           |                          |
| Yes                                              | 28 (24)                   | 34 (27)                  |
| No                                               | 91 (76)                   | 90 (73)                  |
| Deltoid MRC – no.                                |                           |                          |
| Yes                                              | 6/28                      | 9/33                     |
| No                                               | 22/28                     | 24/33                    |
| Biceps MRC – no. (%)                             |                           |                          |
| Yes                                              | 12/28                     | 10/34                    |
| No                                               | 16/28                     | 24/34                    |
| Triceps MRC – no.                                |                           |                          |
| Yes                                              | 9/28                      | 18/34                    |
| No                                               | 19/28                     | 16/34                    |
| Wrist flexion MRC – no.                          |                           |                          |
| Yes                                              | 6/28                      | 9/33                     |
| No                                               | 22/28                     | 24/33                    |
| Wrist extension MRC – no.                        |                           |                          |
| Yes                                              | 7/28                      | 9/33                     |
| No                                               | 21/28                     | 24/33                    |
| Interosseous MRC – no.                           |                           |                          |
| Yes                                              | 14/28                     | 17/33                    |
| No                                               | 14/28                     | 16/33                    |

*Medical Research Council scale (MRC), Number of patients (no.).*

Data was missing for sensibility disorder of 1 patient in the posterior- and 3 in the anterior surgery group; dermatome of 1 patient in the anterior surgery group; muscle atrophy of 38 in the posterior- and 29 in the anterior surgery group; the MRC grade for the musculus deltoideus, wrist flexion and extension, and interosseous in 1 patient in the anterior surgery group.

**eTable 6. Responder analyses<sup>a</sup>**

|                                                              | Mean value at Baseline | Mean value at 1 year | Mean change from Baseline to 1 year | Proportion of patients that reached MCID | Mean difference in proportion of responders in anterior vs. posterior group (95% CI) |
|--------------------------------------------------------------|------------------------|----------------------|-------------------------------------|------------------------------------------|--------------------------------------------------------------------------------------|
| <b>Visual analogue scale – arm pain (0-100)<sup>b</sup></b>  |                        |                      |                                     |                                          |                                                                                      |
| Posterior surgery                                            | 62.3 ± 20.7            | 18.6 ± 22.9          | 41.9 ± 29.5                         | 0.54                                     | 0.06 (-0.09 to 0.2)                                                                  |
| Anterior surgery                                             | 60.3 ± 22.1            | 15.8 ± 23.7          | 45.3 ± 29.7                         | 0.60                                     |                                                                                      |
| <b>Visual analogue scale – neck pain (0-100)<sup>c</sup></b> |                        |                      |                                     |                                          |                                                                                      |
| Posterior surgery                                            | 55.0 ± 22.3            | 24.4 ± 27.5          | 29.5 ± 33.9                         | 0.52                                     | 0.1 (-0.05 to 0.3)                                                                   |
| Anterior surgery                                             | 53.1 ± 23.0            | 21.7 ± 26.1          | 31.6 ± 29.3                         | 0.62                                     |                                                                                      |
| <b>Neck Disability Index score (0-100)<sup>d</sup></b>       |                        |                      |                                     |                                          |                                                                                      |
| Posterior surgery                                            | 43.6 ± 14.1            | 17.6 ± 14.6          | 24.3 ± 15.8                         | 0.66                                     | -0.02 (-0.2 to 0.1)                                                                  |
| Anterior surgery                                             | 42.2 ± 13.5            | 19.2 ± 16.5          | 23.1 ± 16.8                         | 0.63                                     |                                                                                      |
| <b>EuroQol 5-Dimensions 5-Level<sup>e</sup></b>              |                        |                      |                                     |                                          |                                                                                      |
| Posterior surgery                                            | 0.62 ± 0.18            | 0.84 ± 0.15          | 0.20 ± 0.17                         | 0.38                                     | -0.001 (-0.1 to 0.1)                                                                 |
| Anterior surgery                                             | 0.62 ± 0.20            | 0.82 ± 0.14          | 0.19 ± 0.22                         | 0.38                                     |                                                                                      |

Confidence Interval (CI), Minimal Clinical Important Difference (MCID), Standard Deviation (SD).

<sup>a</sup> Plus-minus values are means ± standard deviation.

<sup>b</sup> The prespecified MCID for VAS-arm was a decrease of 41 or more.

<sup>c</sup> The prespecified MCID for VAS-neck was a decrease of 26 or more.

<sup>d</sup> The prespecified MCID for NDI was an improvement of 17.3% or more.

<sup>e</sup> The prespecified MCID for EQ-5D-5L was an improvement of 0.24 or more.

**eTable 7. Specification of adverse events in the intention-to-treat population<sup>a</sup>**

|                                                                 | Posterior surgery (n=119) | Anterior surgery (n=124) | Total (n=243) |
|-----------------------------------------------------------------|---------------------------|--------------------------|---------------|
| <b>Adverse Events - no</b>                                      |                           |                          |               |
| During operation                                                |                           |                          |               |
| Allergic reaction to antibiotics                                | 1                         | 0                        | 1             |
| <b>Total</b>                                                    | <b>1</b>                  | <b>0</b>                 | <b>1</b>      |
| During hospitalization                                          |                           |                          |               |
| Dysphagia or globus sensation <sup>b</sup>                      | 0                         | 1                        | 1             |
| Wound infection                                                 | 1                         | 0                        | 1             |
| Urinary retention                                               | 1                         | 0                        | 1             |
| Panic attack                                                    | 1                         | 0                        | 1             |
| Palpitations                                                    | 1                         | 0                        | 1             |
| Dyspnea                                                         | 0                         | 1                        | 1             |
| <b>Total</b>                                                    | <b>4</b>                  | <b>2</b>                 | <b>6</b>      |
| After discharge                                                 |                           |                          |               |
| Dysphagia or globus sensation <sup>b</sup>                      | 1                         | 5                        | 6             |
| Hoarseness                                                      | 1                         | 2                        | 3             |
| Neck pain                                                       | 2                         | 1                        | 3             |
| Neck- and shoulder symptoms <sup>c</sup>                        | 0                         | 3                        | 3             |
| New radicular symptoms w/o need for surgery <sup>d</sup>        | 1                         | 4                        | 5             |
| Persistent radicular symptoms w/o need for surgery <sup>d</sup> | 8                         | 2                        | 10            |
| Non-radicular arm pain <sup>e</sup>                             | 0                         | 1                        | 1             |
| Shoulder symptoms <sup>f</sup>                                  | 9                         | 6                        | 15            |
| Cardio-thoracic symptoms <sup>g</sup>                           | 1                         | 1                        | 1             |
| Respiratory symptoms <sup>h</sup>                               | 0                         | 1                        | 1             |
| Knee symptoms <sup>i</sup>                                      | 3                         | 0                        | 3             |
| Lower back symptoms <sup>j</sup>                                | 2                         | 2                        | 4             |
| Hip/groin pain                                                  | 1                         | 0                        | 1             |
| Wound problems <sup>k</sup>                                     | 4                         | 2                        | 6             |
| Implant malposition <sup>l</sup>                                | 0                         | 1                        | 1             |
| Elective surgery                                                | 2                         | 8                        | 10            |
| Other <sup>m</sup>                                              | 5                         | 3                        | 9             |
| <b>Total</b>                                                    | <b>40</b>                 | <b>42</b>                | <b>82</b>     |
| <b>Serious Adverse Events – no</b>                              |                           |                          |               |
| During hospitalization                                          |                           |                          |               |
| Anaphylactic reaction to antibiotics                            | 0                         | 1                        | 1             |
| Wound hematoma without need for surgery                         | 1                         | 0                        | 1             |
| Pulmonary embolus                                               | 0                         | 1                        | 1             |
| <b>Total</b>                                                    | <b>1</b>                  | <b>2</b>                 | <b>3</b>      |
| After discharge                                                 |                           |                          |               |
| Unresolved dysphagia within 1-year                              | 0                         | 1                        | 1             |
| Post-operative hematoma                                         | 0                         | 1                        | 1             |
| Non-elective surgery:                                           |                           |                          |               |
| Reoperation at index-level                                      | 4                         | 2                        | 6             |
| Reoperation adjacent level                                      | 0                         | 2                        | 2             |
| Reoperation at index + adjacent level                           | 2                         | 0                        | 2             |
| Other <sup>m</sup>                                              | 1                         | 2                        | 3             |
| Required hospitalization:                                       |                           |                          |               |
| Cardio-thoracic <sup>g</sup>                                    | 3                         | 1                        | 4             |
| Wound problems <sup>k</sup>                                     | 2                         | 1                        | 3             |

|                                |           |           |           |
|--------------------------------|-----------|-----------|-----------|
| Lumbar spondylolisthesis       | 0         | 1         | 1         |
| Urinary retention and cystitis | 1         | 0         | 1         |
| Other <sup>m</sup>             | 1         | 6         | 7         |
| <b>Total</b>                   | <b>14</b> | <b>19</b> | <b>31</b> |

Not applicable (N/A), Without (w/o).

<sup>a</sup> Depicted are all the (serious) adverse events (surgery-related and unrelated) on complication-level (not patient-level). Adverse events were considered serious (SAE) if lethal, life-threatening, required (prolongation of) hospitalization, caused significant disability, were a congenital anomaly or birth defect, or any other medically important event that jeopardized the subject or required intervention.

<sup>b</sup> Dysphagia was temporary in 6 patients and unresolved within 1-year in 1 patient in the anterior surgery group. Hoarseness was temporary in 2 patients in the anterior surgery group. For the patients with dysphagia and hoarseness in the posterior surgery group, it is unknown whether they were resolved within 1-year.

<sup>c</sup> Two patients had a combination of neck-and shoulder pain after being reoperated.

<sup>d</sup> These were new or persistent radicular symptoms without reoperation within 1-year of follow-up. Some of these patients were treated with a selective nerve root blockage, referral to a pain center, pain specialist or were treated conservatively.

<sup>e</sup> These patients had arm pain without signs of radiculopathy.

<sup>f</sup> Shoulder symptoms included patients with shoulder pain, frozen shoulder, or tendinitis supraspinatus. Some of these patients were treated with a local steroid injection .

<sup>g</sup> Cardiothoracic symptoms reported as adverse event included chest pain and atypical thoracic symptoms. Symptoms reported as serious adverse event included myocardial infarction requiring admission and treatment, chest pain during treatment for pericarditis, palpitations, implantation pace maker and coronary angiography.

<sup>h</sup> Respiratory symptoms included coughing and complaints of COPD.

<sup>i</sup> Knee symptoms included pain or a lesion of the meniscus.

<sup>j</sup> Lower back symptoms included low back pain or spondylolisthesis, without the need for surgery.

<sup>k</sup> This includes patients with wound infections, leakage or swelling of the wound. When reported as an adverse event, the wound infection was superficial and treated with oral antibiotics. When reported as serious adverse event, a (longer) hospitalization was required. None of the wound infections were related to esophageal injury.

<sup>l</sup> This patient had a slight cage subsidence at 6 weeks, without complaints and no reoperation.

<sup>m</sup> "Other" included the following complications in the adverse event subsection: gout, hearing loss, diagnosis of polymyalgia rheumatica, fall after surgery, dizzy spell, pain after surgery, subcapital humerus fracture treated conservatively. The following were reported in the serious adverse event subsection for non-elective surgery: lobectomy, resection melanoma and surgery for liver empyema; that required hospitalization: analysis of abdominal pain, collapse and implantation pacemaker, elevated liver enzymes, visit emergency department after fall, viral meningitis, and septic cellulitis.

**eTable 8. Reoperations within 1-year of follow-up**

| Number | Initial treatment      | Initial symptomatic nerve root | Reoperation                  | Reason for reoperation                   | Months after initial surgery |
|--------|------------------------|--------------------------------|------------------------------|------------------------------------------|------------------------------|
| 1.     | Posterior surgery C7.  | C7 Left                        | Anterior surgery C5-6 & C6-7 | Recurrent + new symptoms                 | 10                           |
| 2.     | Posterior surgery C6.  | C6 Right                       | Anterior surgery C5-6        | Recurrent symptoms                       | 4                            |
| 3.     | Posterior surgery C7.  | C7 Left                        | Anterior surgery C5-6 & C6-7 | Recurrent + new symptoms                 | 6                            |
| 4.     | Posterior surgery C6.  | C6 Right                       | Anterior surgery C5-6        | Recurrent symptoms <sup>a</sup>          | 10                           |
| 5.     | Posterior surgery C6.  | C6 Left                        | Anterior surgery C5-6        | New symptoms right                       | 12                           |
| 6.     | Posterior surgery C6.  | C6 Right                       | Anterior surgery C5-6        | Recurrent symptoms                       | 1                            |
| 1.     | Anterior surgery C5-6. | C6 Right                       | Posterior surgery C6         | Recurrent symptoms                       | 10                           |
| 2.     | Anterior surgery C5-6. | C6 Right                       | Anterior surgery C5-6        | Removal intervertebral cage <sup>b</sup> | 7                            |
| 3.     | Anterior surgery C6-7. | C7 Right                       | Anterior surgery C5-6        | New symptoms right                       | 2                            |
| 4.     | Anterior surgery C5-6. | C6 Right                       | Anterior surgery C6-7        | New symptoms right                       | 8                            |

<sup>a</sup> After the reoperation, the wound drain had to be surgically removed.

<sup>b</sup> Cage was removed due to malposition and a low-grade infection.

## SUPPLEMENTARY QUESTIONNAIRES

The assessment of the Odom criteria<sup>1,2</sup> was provided to the independent, blinded interviewers in English. The patient reported outcome measures were provided to the participants in Dutch.

|                                                                                   |              |                               |
|-----------------------------------------------------------------------------------|--------------|-------------------------------|
|  | <b>FACET</b> | Patient number  _ _ - _ _ _ _ |
|-----------------------------------------------------------------------------------|--------------|-------------------------------|

**Visit** |\_| T5 |\_| T6 |\_| T7 |\_| T8

**Were the Odom's criteria assessed?** |\_| No |\_| Yes

*If yes, date* |\_|\_|-|\_|\_|\_|\_|-|\_|\_|\_|\_| (DDMMMJJJJ)

**How would you classify the outcome of the operation regarding improvement of complaints and ability to perform daily activities?**

**Excellent:** complete improvement of complaints referable to cervical pathology. Able to perform daily activities without limitations.

**Good;** moderate to large improvement of complaints referable to cervical pathology. Able to perform daily activities without significant limitations.

**Satisfactory;** slight improvement of complaints referable to cervical pathology. Significant limitations in daily activities.

**Poor:** no improvement or aggravation of complaints referable to cervical pathology. Not able to perform daily activities.

Name \_\_\_\_\_ Date |\_|\_|-|\_|\_|\_|\_|-|\_|\_|\_|\_|

Signature \_\_\_\_\_



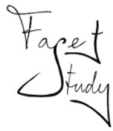

## FACET

Studienummer |\_\_|\_|-|\_\_|\_|\_|

Zet bij iedere groep in de lijst hieronder een kruisje in het hokje dat het best past bij uw gezondheid

| <b>MOBILITEIT</b>                                                                                  |                          |
|----------------------------------------------------------------------------------------------------|--------------------------|
| Ik heb geen problemen met lopen                                                                    | <input type="checkbox"/> |
| Ik heb een beetje problemen met lopen                                                              | <input type="checkbox"/> |
| Ik heb matige problemen met lopen                                                                  | <input type="checkbox"/> |
| Ik heb ernstige problemen met lopen                                                                | <input type="checkbox"/> |
| Ik ben niet in staat om te lopen                                                                   | <input type="checkbox"/> |
| <b>ZELFZORG</b>                                                                                    |                          |
| Ik heb geen problemen met mijzelf wassen of aankleden                                              | <input type="checkbox"/> |
| Ik heb een beetje problemen met mijzelf wassen of aankleden                                        | <input type="checkbox"/> |
| Ik heb matige problemen met mijzelf wassen of aankleden                                            | <input type="checkbox"/> |
| Ik heb ernstige problemen met mijzelf wassen of aankleden                                          | <input type="checkbox"/> |
| Ik ben niet in staat mijzelf te wassen of aan te kleden                                            | <input type="checkbox"/> |
| <b>DAGELIJKSE ACTIVITEITEN</b> (bijv. werk, studie, huishouden, gezins- en vrijetijdsactiviteiten) |                          |
| Ik heb geen problemen met mijn dagelijkse activiteiten                                             | <input type="checkbox"/> |
| Ik heb een beetje problemen met mijn dagelijkse activiteiten                                       | <input type="checkbox"/> |
| Ik heb matige problemen met mijn dagelijkse activiteiten                                           | <input type="checkbox"/> |
| Ik heb ernstige problemen met mijn dagelijkse activiteiten                                         | <input type="checkbox"/> |
| Ik ben niet in staat mijn dagelijkse activiteiten uit te voeren                                    | <input type="checkbox"/> |
| <b>PIJN / ONGEMAK</b>                                                                              |                          |
| Ik heb geen pijn of ongemak                                                                        | <input type="checkbox"/> |
| Ik heb een beetje pijn of ongemak                                                                  | <input type="checkbox"/> |
| Ik heb matige pijn of ongemak                                                                      | <input type="checkbox"/> |
| Ik heb ernstige pijn of ongemak                                                                    | <input type="checkbox"/> |
| Ik heb extreme pijn of ongemak                                                                     | <input type="checkbox"/> |
| <b>ANGST / SOMBERHEID</b>                                                                          |                          |
| Ik ben niet angstig of somber                                                                      | <input type="checkbox"/> |
| Ik ben een beetje angstig of somber                                                                | <input type="checkbox"/> |
| Ik ben matig angstig of somber                                                                     | <input type="checkbox"/> |
| Ik ben erg angstig of somber                                                                       | <input type="checkbox"/> |



Ik ben extreem angstig of somber

|                                                                                   |              |                                    |
|-----------------------------------------------------------------------------------|--------------|------------------------------------|
|  | <b>FACET</b> | Studienummer   _ _   -   _ _   _ _ |
|-----------------------------------------------------------------------------------|--------------|------------------------------------|

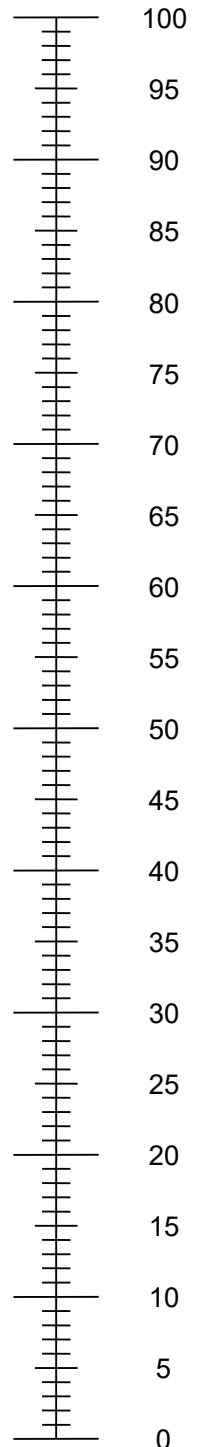

UW GEZONDHEID =

De slechtste  
gezondheid die u  
zich kunt  
voorstellen

|                                                                                   |              |                             |
|-----------------------------------------------------------------------------------|--------------|-----------------------------|
|  | <b>FACET</b> | Studienummer  __ _ - __ _ _ |
|-----------------------------------------------------------------------------------|--------------|-----------------------------|

## Neck Disability Index

### 1. Pijn

0. Ik heb nu geen pijn
1. Ik heb nu weinig pijn
2. Ik heb nu matige pijn
3. Ik heb nu vrij hevige pijn
4. Ik heb nu zeer hevige pijn
5. Ik heb nu de slechtst denkbare pijn

### 2. Persoonlijke verzorging (wassen, aan- en uitkleden)

0. Ik kan goed voor mezelf zorgen zonder dat de pijn toeneemt
1. Ik kan goed voor mezelf zorgen hoewel dat de pijn doet toenemen
2. Voor mezelf zorgen is pijnlijk en gaat langzaam en voorzichtig
3. Voor mezelf zorgen lukt goed maar vaak met enige hulp
4. Elke dag voor mezelf zorgen lukt meestal alleen met hulp
5. Ik kan mezelf niet aankleden; mezelf wassen gaat moeilijk en ik blijf in bed

### 3. Tillen

0. Ik kan een zwaar gewicht tillen zonder dat de pijn toeneemt
1. Ik kan een zwaar gewicht tillen, maar dat doet de pijn toenemen
2. De pijn weerhoudt mij van het optillen van een zwaar gewicht van de grond, maar zou dat wel kunnen wanneer dat gewicht hoger (bijv. op een tafel) gelegen is
3. De pijn weerhoudt mij ervan om zware dingen op te tillen, maar het lukt me wel om lichte tot middelzware gewichten te tillen als ze makkelijk geplaatst zijn
4. Ik kan alleen zeer lichte gewichten tillen
5. Ik kan helemaal niets tillen of dragen

### 4. Lezen

0. Ik kan zo veel lezen als ik wil zonder pijn in mijn nek
1. Ik kan zo veel lezen als ik wil met weinig pijn in mijn nek
2. Ik kan zo veel lezen als ik wil met matige pijn in mijn nek
3. Ik kan niet zo veel lezen als ik zou willen vanwege de matige pijn in mijn nek
4. Ik kan bijna niet meer lezen vanwege de hevige pijn in mijn nek
5. Ik kan helemaal niet meer lezen

### 5. Hoofdpijn

0. Ik heb helemaal geen hoofdpijn
1. Ik heb af en toe lichte hoofdpijn
2. Ik heb af en toe matige hoofdpijn
3. Ik heb vaak matige hoofdpijn
4. Ik heb vaak hevige hoofdpijn
5. Ik heb bijna altijd hoofdpijn

## **6. Concentratie**

0. Ik kan mij goed concentreren zonder moeite wanneer ik dat wil
1. Ik kan mij goed concentreren met enige moeite wanneer ik dat wil
2. Het kost mij duidelijk moeite om te concentreren wanneer ik dat wil
3. Het kost mij veel moeite om te concentreren wanneer ik dat wil
4. Het kost mij zeer veel moeite om te concentreren wanneer ik dat wil
5. Ik kan mij helemaal niet concentreren

## **7. Werk**

0. Ik kan zo veel werk doen als ik wil
1. Ik kan alleen mijn gewone werk doen, maar niet meer
2. Ik kan het grootste deel van mijn gewone werk doen, maar niet meer
3. Ik kan mijn gewone werk niet doen
4. Ik kan bijna geen enkel werk meer doen
5. Ik kan helemaal niet meer werken

## **8. Autorijden**

0. Ik kan autorijden zonder enige nekpijn
1. Ik kan autorijden zo lang als ik wil met weinig pijn in mijn nek
2. Ik kan autorijden zo lang als ik wil met matige pijn in mijn nek
3. Ik kan niet autorijden zo lang als ik wil vanwege de matige pijn in mijn nek
4. Ik kan bijna niet meer autorijden vanwege de hevige pijn in mijn nek
5. Ik kan helemaal niet meer autorijden

## **9. Slapen**

0. Ik heb geen moeite met slapen
1. Mijn slaap is heel licht gestoord (minder dan 1 uur wakker)
2. Mijn slaap is licht gestoord (1 tot 2 uur wakker)
3. Mijn slaap is matig gestoord (2 tot 3 uur wakker)
4. Mijn slaap is fors gestoord (3 tot 5 uur wakker)
5. Mijn slaap is volledig gestoord (5 tot 7 uur wakker)

## **10. Vrije tijd**

0. Ik kan aan alle activiteiten meedoen zonder enige pijn in mijn nek
1. Ik kan aan alle activiteiten meedoen met enige pijn in mijn nek
2. Vanwege de pijn in mijn nek kan ik aan de meeste, maar niet alle, gebruikelijke activiteiten meedoen
3. Vanwege de pijn in mijn nek kan ik aan maar weinig gebruikelijke activiteiten meedoen
4. Vanwege de pijn in mijn nek kan ik nagenoeg aan geen activiteiten meedoen
5. Ik kan aan geen enkele activiteit meer meedoen

|                                                                                   |              |                           |
|-----------------------------------------------------------------------------------|--------------|---------------------------|
|  | <b>FACET</b> | Studienummer  _ _ - _ _ _ |
|-----------------------------------------------------------------------------------|--------------|---------------------------|

**WAI (Single item)**

**Veronderstel dat uw werkvermogen in de beste periode van uw leven een waarde van 10 punten bedroeg. Hoeveel punten zou u dan aan het huidige werkvermogen toekennen?**

(‘0’ betekent dat u momenteel geheel niet in staat bent om te werken, ‘10’ betekent dat uw werkvermogen zich in de beste periode van uw leven bevindt)

|             |                                                                                                                                                                       |                 |
|-------------|-----------------------------------------------------------------------------------------------------------------------------------------------------------------------|-----------------|
| geheel niet |                                                                                                                                                                       | werkvermogen in |
| in staat om | O <sub>0</sub> O <sub>1</sub> O <sub>2</sub> O <sub>3</sub> O <sub>4</sub> O <sub>5</sub> O <sub>6</sub> O <sub>7</sub> O <sub>8</sub> O <sub>9</sub> O <sub>10</sub> | beste periode   |
| te werken   |                                                                                                                                                                       | van uw leven    |

## TEVREDENHEID NA OPERATIE

**Hoe tevreden bent u over de uitkomst van de operatie? (één antwoord aanvinken)**

- Zeer tevreden
- Tevreden
- Enigszins tevreden
- Niet tevreden, niet ontevreden
- Enigszins ontevreden
- Ontevreden
- Zeer ontevreden

**Welke verandering van klachten heeft u bemerkt sinds het ontstaan van deze klachten? (één antwoord aanvinken)**

- Volledig herstel van klachten
- Bijna volledig herstel van klachten
- Enig herstel van klachten
- Klachten gelijk gebleven
- Enige verslechtering van klachten
- Ernstige verslechtering van klachten
- Klachten erger dan ooit

## TRANSLATED QUESTIONNAIRES

### Visual Analogue Scale<sup>3</sup>

Date

|\_|\_|-|\_|\_|\_|-|\_|\_|\_| (DDMMMYYYY)

VAS arm pain

How would you rate the pain in your arm on average in the last 7 days on 0-100mm scale?  
("0" stands for no pain at all, "100" stands for the worst possible pain)

|  |       |     |  |
|--|-------|-----|--|
|  | <hr/> |     |  |
|  | 0     | 100 |  |

VAS arm pain =

VAS neck pain

How would you rate the pain in your neck on average in the last 7 days on 0-100mm scale?  
("0" stands for no pain at all, "100" stands for the worst possible pain)

|  |       |     |  |
|--|-------|-----|--|
|  | <hr/> |     |  |
|  | 0     | 100 |  |

VAS neck pain =

## Neck Disability Index<sup>4,5</sup>

### 1. Pain Intensity

- 0 I have no pain at the moment
- 1 The pain is very mild at the moment
- 2 The pain is moderate at the moment
- 3 The pain is fairly severe at the moment
- 4 The pain is very severe at the moment
- 5 The pain is the worst imaginable at the moment

### 2. Personal care (washing, dressing etc)

- 0 I can look after myself normally without causing extra pain
- 1 I can look after myself normally but it is very painful
- 2 It is painful to look after myself and I am slow and careful
- 3 I need some help but manage most of my personal care
- 4 I need help every day in most aspects of self-care
- 5 I do not get dressed, wash with difficulty and stay in bed

### 3. Lifting

- 0 I can lift heavy weights without extra pain
- 1 I can lift heavy weights but it gives extra pain
- 2 Pain prevents me from lifting weights off the floor but I can manage if they are conveniently positioned, e.g. on a table
- 3 Pain prevents me from lifting weights off the floor but I can manage light to medium weights if they are conveniently positioned
- 4 I can lift only very light weights
- 5 I cannot lift or carry anything at all

### 4. Reading

- 0 I can read as much as I want to with no pain in my neck
- 1 I can read as much as I want to with slight pain in my neck
- 2 I can read as much as I want to with moderate pain in my neck
- 3 I cannot read as much as I want because of moderate pain in my neck
- 4 I can hardly read at all because of severe pain in my neck
- 5 I cannot read at all

### 5. Headaches

- 0 I have no headaches at all
- 1 I have slight headaches which come infrequently
- 2 I have moderate headaches which come infrequently
- 3 I have moderate headaches which come frequently
- 4 I have severe headaches which come frequently
- 5 I have headaches almost all the time

### 6. Concentration

- 0 I can concentrate fully when I want to with no difficulty
- 1 I can concentrate fully when I want to with slight difficulty
- 2 I have a fair degree of difficulty in concentrating when I want to
- 3 I have a lot of difficulty concentrating when I want to
- 4 I have a great deal of difficulty concentrating when I want to
- 5 I cannot concentrate at all

**7. Work**

- 0 I can do as much work as I want to
- 1 I can only do my usual work, but no more
- 2 I can do most of my usual work, but no more
- 3 I cannot do my usual work
- 4 I can hardly do any work at all
- 5 I cannot do any work at all

**8. Driving**

- 0 I can drive my car without any neck pain
- 1 I can drive my car as long as I want with slight pain in my neck
- 2 I can drive my car as long as I want with moderate pain in my neck
- 3 I cannot drive my car as long as I want because of moderate pain in my neck
- 4 I can hardly drive at all because of severe pain in my neck
- 5 I cannot drive my car at all

**9. Sleeping**

- 0 I have no trouble sleeping
- 1 My sleep is slightly disturbed (less than 1 hour sleepless)
- 2 My sleep is mildly disturbed (1-2 hours sleepless)
- 3 My sleep is moderately disturbed (2-3 hours sleepless)
- 4 My sleep is greatly disturbed (3-5 hours sleepless)
- 5 My sleep is completely disturbed (5-7 hours)

**10. Recreation**

- 0 I am able to engage in all of my recreational activities with no neck pain at all
- 1 I am able to engage in all of my recreational activities with some pain in my neck
- 2 I am able to engage in most, but not all of my recreational activities because of pain in my neck
- 3 I am able to engage in a few of my recreational activities because of pain in my neck
- 4 I can hardly do any recreational activities because of pain in my neck
- 5 I cannot do any recreational activities at all



## EuroQol 5 Dimensions 5 level Survey<sup>6-8</sup>

| <b>Under each heading, please tick the ONE box that best describes your health TODAY.</b> |                          |
|-------------------------------------------------------------------------------------------|--------------------------|
| <b>MOBILITY</b>                                                                           |                          |
| I have no problems in walking about                                                       | <input type="checkbox"/> |
| I have slight problems in walking about                                                   | <input type="checkbox"/> |
| I have moderate problems in walking about                                                 | <input type="checkbox"/> |
| I have severe problems in walking about                                                   | <input type="checkbox"/> |
| I am unable to walk about                                                                 | <input type="checkbox"/> |
| <b>SELF-CARE</b>                                                                          |                          |
| I have no problems washing or dressing myself                                             | <input type="checkbox"/> |
| I have slight problems washing or dressing myself                                         | <input type="checkbox"/> |
| I have moderate problems washing or dressing myself                                       | <input type="checkbox"/> |
| I have severe problems washing or dressing myself                                         | <input type="checkbox"/> |
| I am unable to wash or dress myself                                                       | <input type="checkbox"/> |
| <b>USUAL ACTIVITIES (e.g. work, study, housework, family or leisure activities)</b>       |                          |
| I have no problems doing my usual activities                                              | <input type="checkbox"/> |
| I have slight problems doing my usual activities                                          | <input type="checkbox"/> |
| I have moderate problems doing my usual activities                                        | <input type="checkbox"/> |
| I have severe problems doing my usual activities                                          | <input type="checkbox"/> |
| I am unable to do my usual activities                                                     | <input type="checkbox"/> |
| <b>PAIN / DISCOMFORT</b>                                                                  |                          |
| I have no pain or discomfort                                                              | <input type="checkbox"/> |
| I have slight pain or discomfort                                                          | <input type="checkbox"/> |
| I have moderate pain or discomfort                                                        | <input type="checkbox"/> |
| I have severe pain or discomfort                                                          | <input type="checkbox"/> |
| I have extreme pain or discomfort                                                         | <input type="checkbox"/> |
| <b>ANXIETY / DEPRESSION</b>                                                               |                          |
| I am not anxious or depressed                                                             | <input type="checkbox"/> |
| I am slightly anxious or depressed                                                        | <input type="checkbox"/> |
| I am moderately anxious or depressed                                                      | <input type="checkbox"/> |
| I am severely anxious or depressed                                                        | <input type="checkbox"/> |
| I am extremely anxious or depressed                                                       | <input type="checkbox"/> |

|  |
|--|
|  |
|  |
|  |
|  |
|  |

The best health  
you can imagine

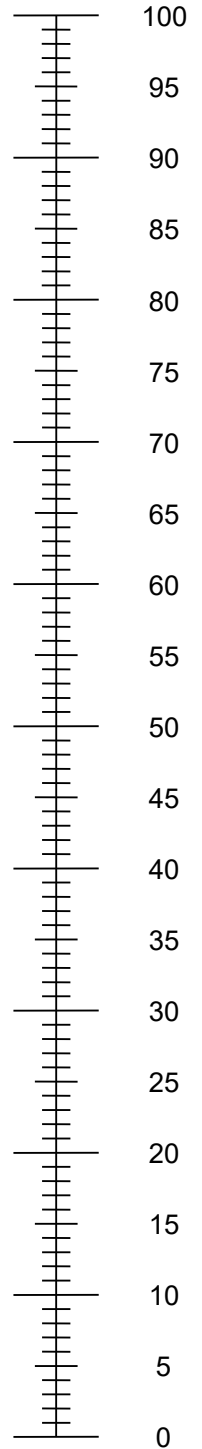

YOUR HEALTH =

The worst health  
you can imagine



## **Satisfaction score<sup>11</sup>**

**How satisfied are you about the surgery? (mark 1 answer)**

- Completely satisfied
- Satisfied
- Somewhat satisfied
- Not satisfied, not dissatisfied
- Somewhat dissatisfied
- Dissatisfied
- Extremely dissatisfied

**How did your complaints change since the start of the treatment? (mark 1 answer)**

- Completely improved
- Improved
- Somewhat improved
- Not improved, not worsened
- Somewhat worsened
- Worsened
- Extremely worsened

## References questionnaires

### Odom

1. Odom GL, Finney W, Woodhall B. Cervical disk lesions. *J Am Med Assoc*. 1958;166(1):23-28.
2. Broekema AEH, Molenberg R, Kuijlen JMA, et al. The Odom Criteria: Validated at Last: A Clinimetric Evaluation in Cervical Spine Surgery. *J Bone Joint Surg Am*. 2019;101(14):1301-1308.

### Visual Analogue Sscale arm/neck pain

3. Huskisson EC. Measurement of pain. *Lancet*. 1974;2(7889):1127-1131.

### Neck Disability Index

4. Vernon H, Mior S. The neck disability index: A study of reliability and validity. *J Manipulative Physiol Ther*. 1991;14(7):409-415.
5. Jorritsma W, de Vries G,E., Dijkstra PU, Geertzen JHB, Reneman MF. Neck pain and disability scale and neck disability index: Validity of dutch language versions. *European Spine Journal*. 2011;21(1):93-100.

### EuroQol 5 Dimensions 5 level Survey

6. Janssen MF, Pickard AS, Golicki D, et al. Measurement properties of the EQ-5D-5L compared to the EQ-5D-3L across eight patient groups: A multi-country study. *Qual Life Res*. 2013;22(7):1717-1727.
7. Soer R, Reneman MF, Speijer BL, Coppes MH, Vroomen PC. Clinimetric properties of the EuroQol-5D in patients with chronic low back pain. *Spine J*. 2012;12(11):1035-1039.
8. Versteegh M,M., Vermeulen K,M., Evers S,M.A.A., de Wit GA, Prenger R, Stolk E,A. Dutch tariff for the five-level version of EQ-5D. *Value in Health*.

### Work ability index – Single Item

9. El Fassi M, Bocquet V, Majery N, Lair ML, Couffignal S, Mairiaux P. Work ability assessment in a worker population: Comparison and determinants of work ability index and work ability score. *BMC Public Health*. 2013;13:305-2458-13-305.
10. de Zwart BC, Frings-Dresen MH, van Duivenbooden JC. Test-retest reliability of the work ability index questionnaire. *Occup Med (Lond)*. 2002;52(4):177-181

### Satisfaction

11. Kamper SJ, Maher CG, Mackay G. Global rating of change scales: a review of strengths and weaknesses and considerations for design. *J Man Manip Ther*. 2009; 17(3):163-70.
