# Supplementary material
Source: PubMed Central journal article supplement (PMC9679957)
Supplement: jamaneurol-e224208-s005.pdf [file jamaneurol-e224208-s005.pdf]

\*First name, last name, and suffix (if applicable) are required and will appear in PubMed.

| <b>*Group Name(s): FACET investigators</b> |                   |                              |                  |                                                                                                                     |                                          |                                                         |                                                                                            |
|--------------------------------------------|-------------------|------------------------------|------------------|---------------------------------------------------------------------------------------------------------------------|------------------------------------------|---------------------------------------------------------|--------------------------------------------------------------------------------------------|
| <b>*First Name and Middle Initial(s)</b>   | <b>*Last Name</b> | <b>*Suffix (eg, Jr, III)</b> | Academic Degrees | Institution                                                                                                         | Location (city, state/province, country) | Role or Contribution, eg, chair, principal investigator | Group (if more than 1 Group listed in the byline) and/or Subgroup (eg, Steering Committee) |
| Paul                                       | Plas              |                              |                  | Department of Neurosurgery, Martini Hospital Groningen                                                              | Groningen, Netherlands                   |                                                         |                                                                                            |
| Menno R                                    | Germans           |                              | MD PhD           | Department of Neurosurgery, Radboud University Medical Center Nijmegen and Canisius Wilhelmina Hospital Nijmegen    | Nijmegen, The Netherlands                |                                                         |                                                                                            |
| Susan                                      | van Kuijk         |                              |                  | Department of Neurosurgery, Canisius Wilhelmina Hospital Nijmegen                                                   | Nijmegen, The Netherlands                |                                                         |                                                                                            |
| Kim                                        | Rijkers           |                              | MD PhD           | Department of Neurosurgery, Zuyderland Medical Center,                                                              | Heerlen, The Netherlands                 |                                                         |                                                                                            |
| Regina                                     | Giepmans          |                              |                  | Department of Neurosurgery, Zuyderland Medical Center,                                                              | Heerlen, The Netherlands                 |                                                         |                                                                                            |
| Robin                                      | van Zijl          |                              |                  | Department of Neurosurgery, Medical Center Haaglanden                                                               | The Hague, The Netherlands               |                                                         |                                                                                            |
| Irene                                      | van Beelen        |                              |                  | Department of Neurosurgery, Medical Center Haaglanden                                                               | The Hague, The Netherlands               |                                                         |                                                                                            |
| Norbert                                    | Höss              |                              | MD               | Department of Neurosurgery, Medisch Spectrum Twente                                                                 | Enschede, The Netherlands                |                                                         |                                                                                            |
| Terry                                      | Bruggink          |                              |                  | Department of Neurosurgery, Medisch Spectrum Twente                                                                 | Enschede, The Netherlands                |                                                         |                                                                                            |
| Paula                                      | van Limpt-Vriens  |                              |                  | Department of Neurosurgery, Elisabeth Tweesteden Ziekenhuis                                                         | Tilburg, The Netherlands                 |                                                         |                                                                                            |
| Antoinette D I                             | van Asselt        |                              | PhD              | Department of Epidemiology and Department of Pharmacy, University of Groningen, University Medical Center Groningen | Groningen, The Netherlands               |                                                         |                                                                                            |
| Diane H                                    | Steenks           |                              |                  | Department of Neurosurgery, University of Groningen, University Medical Center Groningen                            | Groningen, The Netherlands               |                                                         |                                                                                            |
| Gezina AT                                  | Lesman-Leegte     |                              | RN PhD           | Department of Epidemiology, University of Groningen, University Medical Center Groningen                            | Groningen, The Netherlands               |                                                         |                                                                                            |
