# Supplementary material
Source: PubMed Central journal article supplement (PMC9679957)
Supplement: jamaneurol-e224208-s006.pdf [file jamaneurol-e224208-s006.pdf]

## Data Sharing Statement

Broekema. Noninferiority of Posterior Cervical Foraminotomy vs Anterior Cervical Discectomy With Fusion for Procedural Success and Reduction in Arm Pain Among Patients With Cervical Radiculopathy at 1 Year. *JAMA Neurol*. Published November 21, 2022.  
doi:10.1001/jamaneurol.2022.4208

### Data

**Data available:** Yes

**Data types:** Deidentified participant data

**How to access data:** After completion of the trial, data is available on request ([a.e.h.broekema@umcg.nl](mailto:a.e.h.broekema@umcg.nl))

**When available:** beginning date: 12-01-2023

### Supporting Documents

**Document types:** None

### Additional Information

**Who can access the data:** na

**Types of analyses:** na

**Mechanisms of data availability:** na
